# Supplementary material for: DYRK1A promotes viral entry of highly pathogenic human coronaviruses in a kinase-independent manner
Source: PubMed Central journal article supplement (PMC10263356; doi:10.1371/journal.pbio.3002097), 2023-06-13

# Supplemental Figure 1

VSVpp-Rluc-SARS2-S

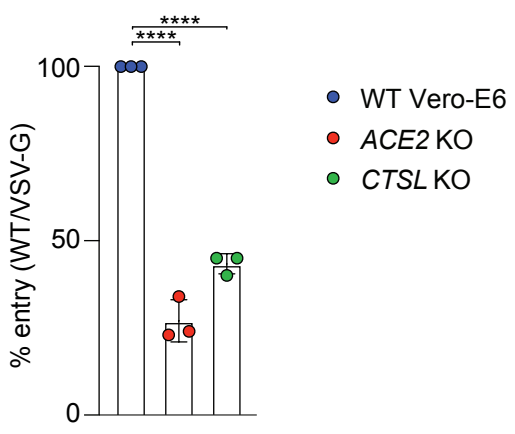

Supplement: pbio.3002097.s003.pdf [file pbio.3002097.s003.pdf]
