# Supplementary material for: DYRK1A promotes viral entry of highly pathogenic human coronaviruses in a kinase-independent manner
Source: PubMed Central journal article supplement (PMC10263356; doi:10.1371/journal.pbio.3002097), 2023-06-13
Supplement: pbio.3002097.s004.pdf [file pbio.3002097.s004.pdf]

# Supplemental Figure 2

## A SARS-CoV-2 (WA/01/2020)

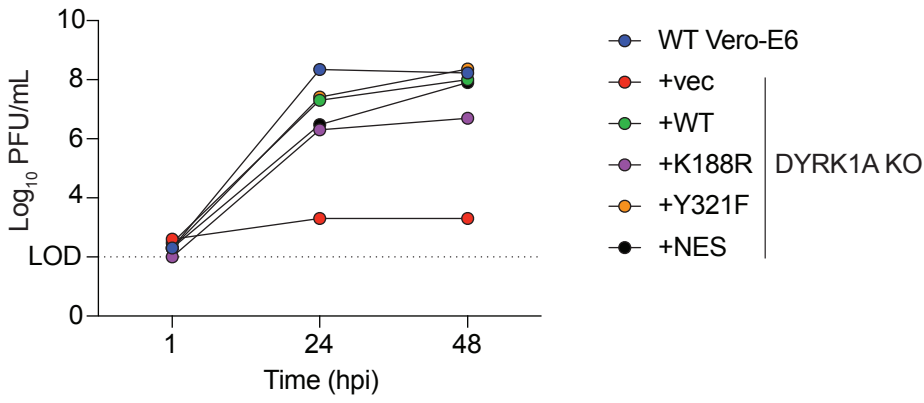

## B Calpain inhibitor III (positive control)

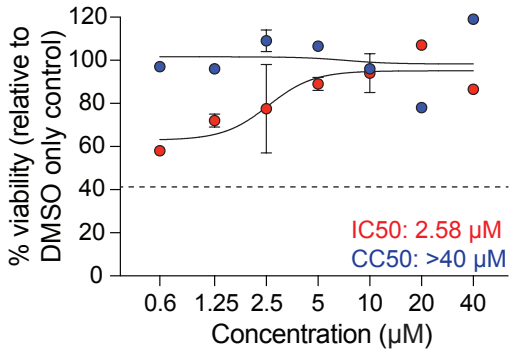

## Harmine

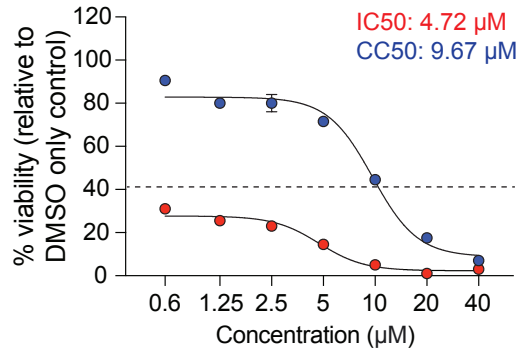

## INDY

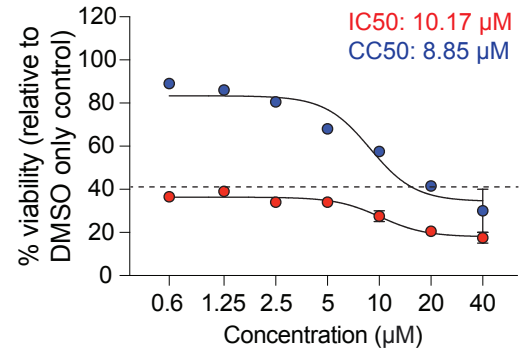

## DYR219

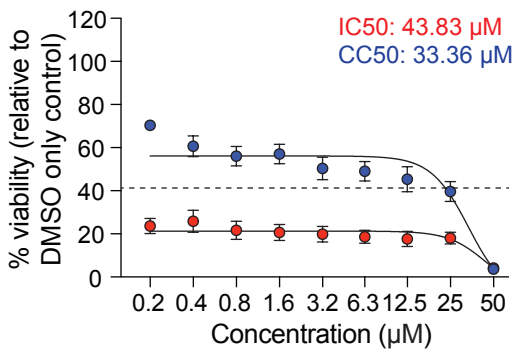

## DYR533

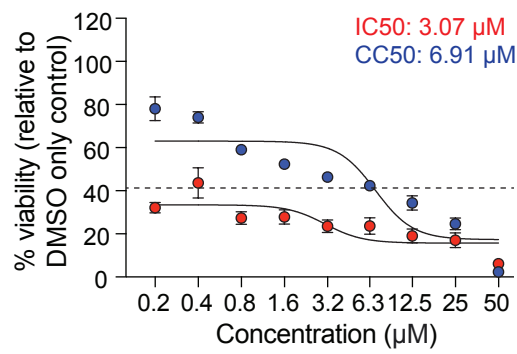

- drug only (cytotoxicity)
- drug+virus
- ⋯ virus only (cytopathic effect)
