# Supplementary material for: DYRK1A promotes viral entry of highly pathogenic human coronaviruses in a kinase-independent manner
Source: PubMed Central journal article supplement (PMC10263356; doi:10.1371/journal.pbio.3002097), 2023-06-13

# Supplemental Figure 3

A

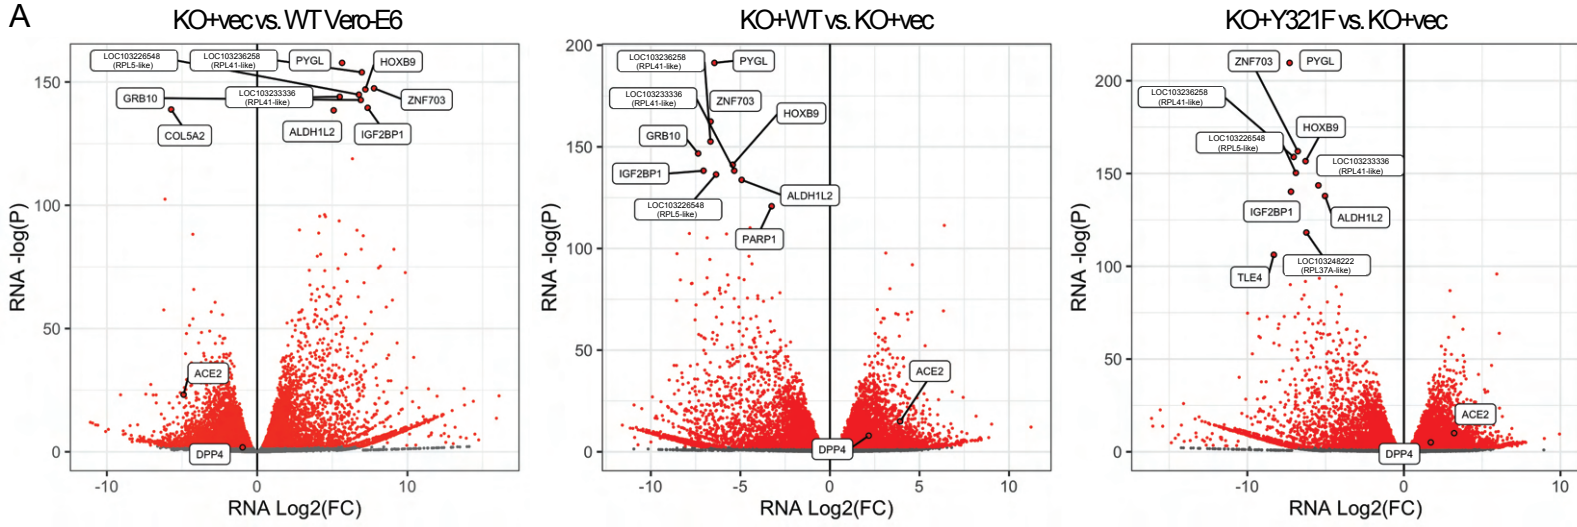

B

- regulation of transforming growth factor beta production (GO:0071634)
- extracellular structure organization (GO:0043062)
- external encapsulating structure organization (GO:0045229)
- extracellular matrix organization (GO:0030198)
- skin development (GO:0043588)
- regulation of extracellular matrix assembly (GO:1901201)
- negative regulation of extracellular matrix organization (GO:1903054)
- cell junction maintenance (GO:0034331)
- negative regulation of macrophage cytokine production (GO:0010936)
- negative regulation of plasminogen activation (GO:0010757)

C

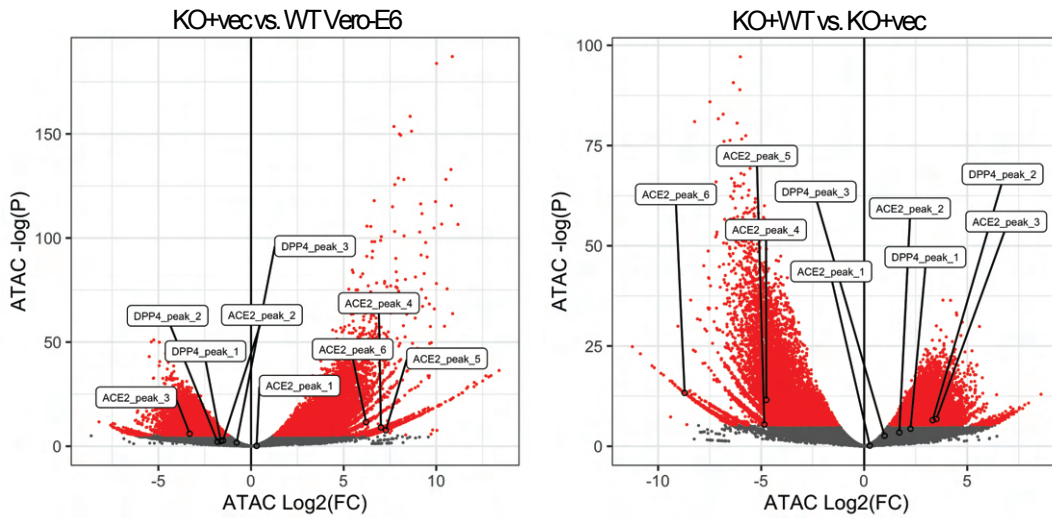

Supplement: pbio.3002097.s005.pdf [file pbio.3002097.s005.pdf]
