# Supplementary material for: DYRK1A promotes viral entry of highly pathogenic human coronaviruses in a kinase-independent manner
Source: PubMed Central journal article supplement (PMC10263356; doi:10.1371/journal.pbio.3002097), 2023-06-13

# Supplemental Figure 4

PCA plot (ATAC all sites)

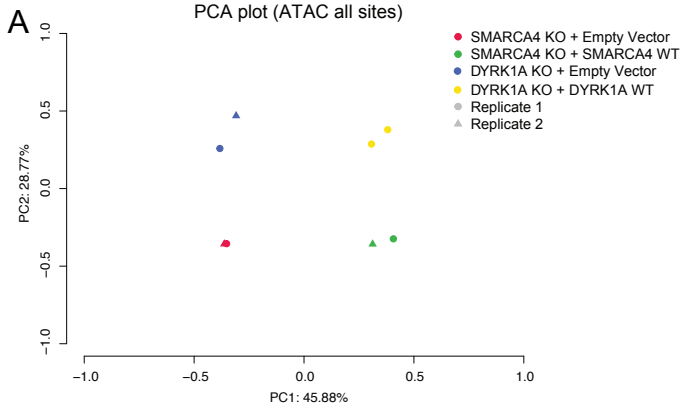

Correlation heatmap of all ATAC sites

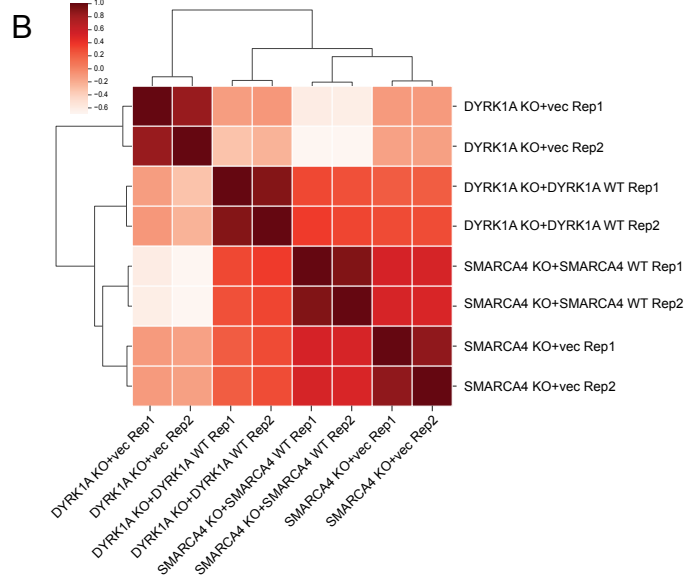

Correlation heatmap (ATAC log2 fold change)  
Correlation coefficient = 0.33

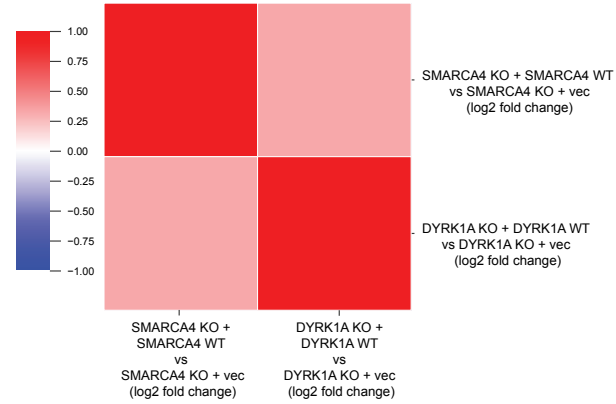

**D**  
Gained: SMARCA4 KO+WT vs. SMARCA4 KO+vec  
Gained: DYRK1A KO+WT vs. DYRK1A KO+vec

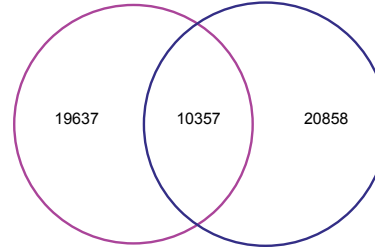

Correlation heatmap (RNA-Seq log2 fold change)  
Correlation coefficient = 0.08

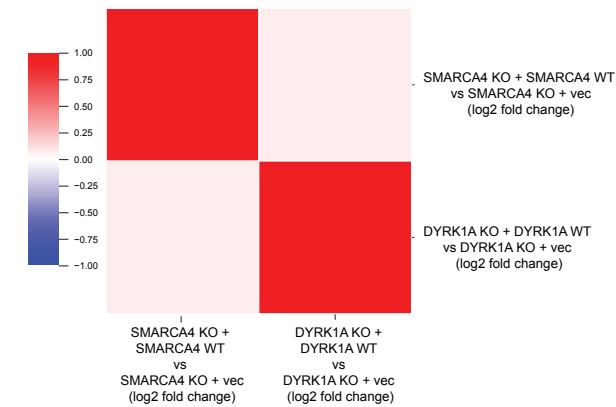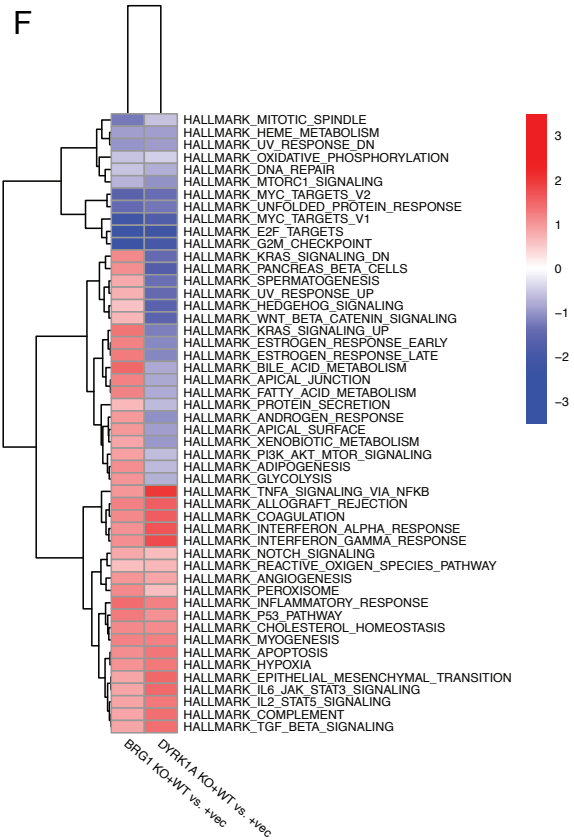

Supplement: pbio.3002097.s006.pdf [file pbio.3002097.s006.pdf]
