# Supplementary material for: DYRK1A promotes viral entry of highly pathogenic human coronaviruses in a kinase-independent manner
Source: PubMed Central journal article supplement (PMC10263356; doi:10.1371/journal.pbio.3002097), 2023-06-13

**Supplemental Figure 5**

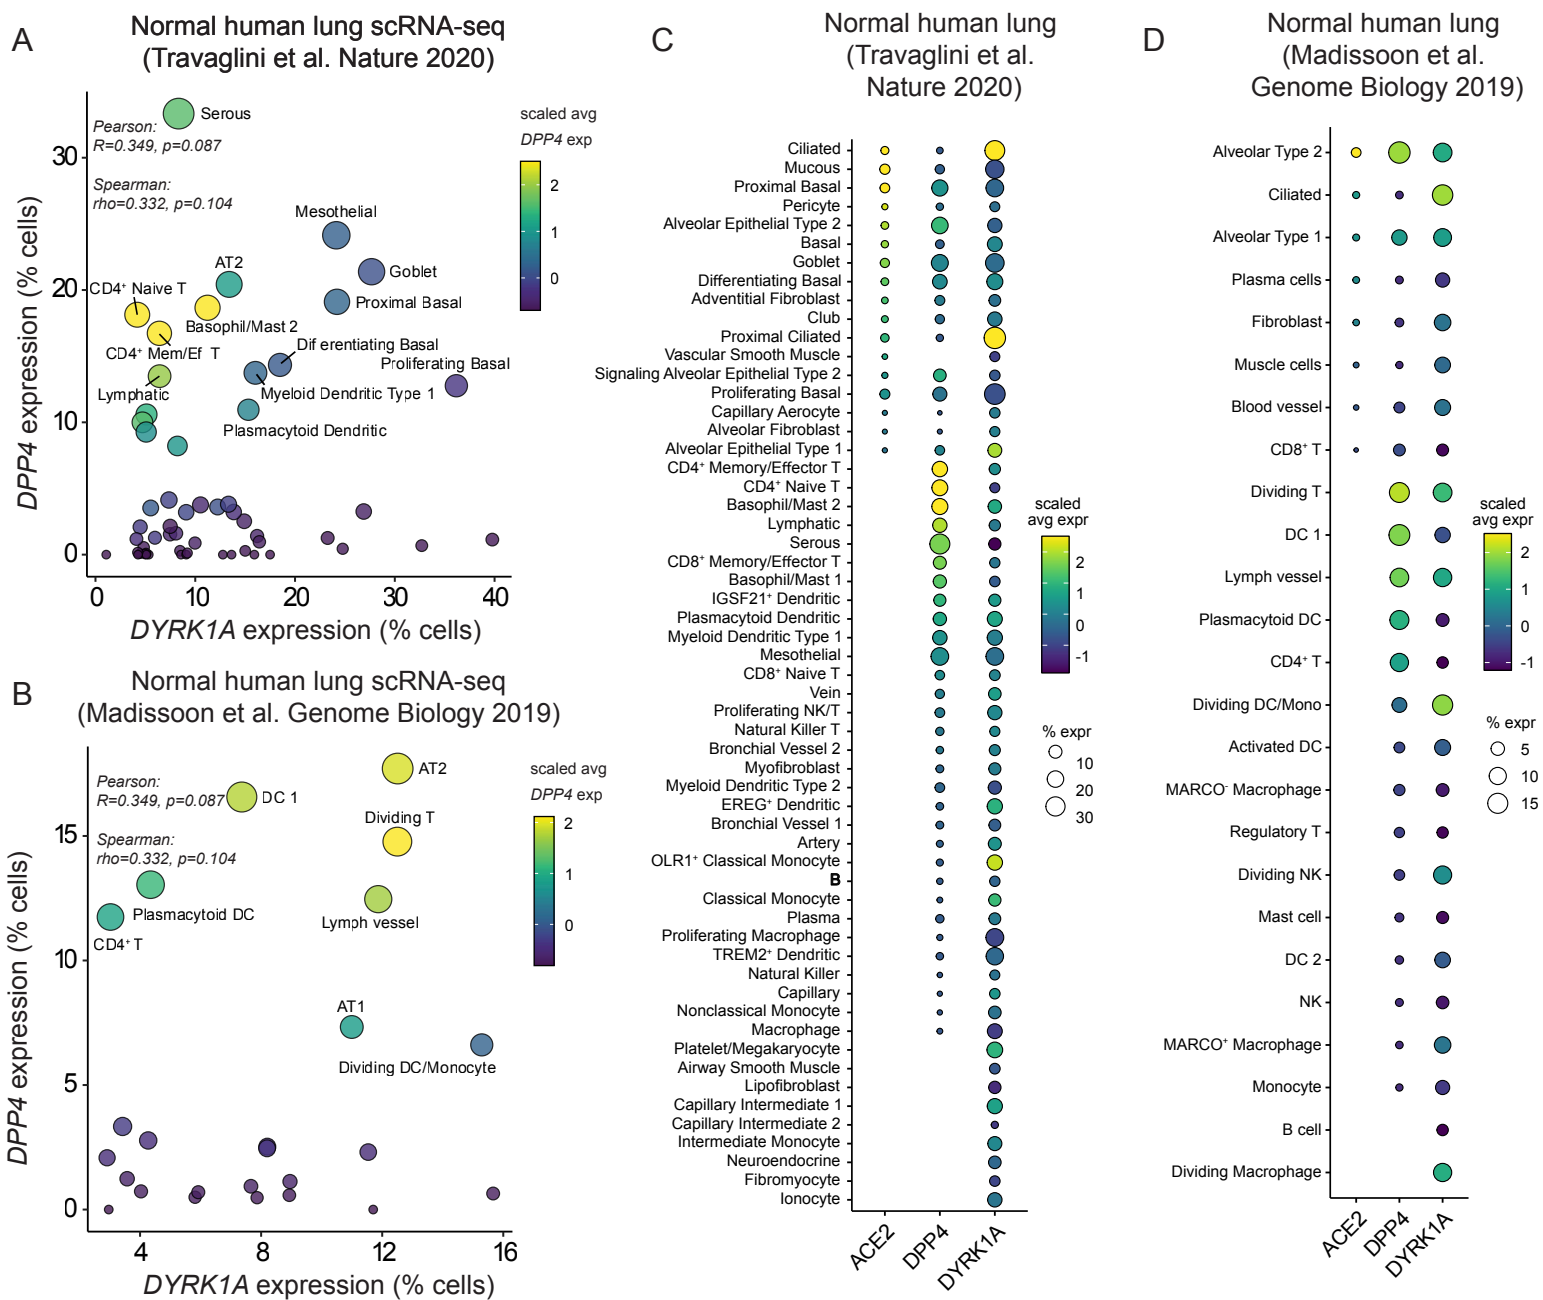

Supplement: pbio.3002097.s007.pdf [file pbio.3002097.s007.pdf]
